# Supplementary material for: An exploration of the statutory Healthy Start vitamin supplementation scheme in North West England
Source: Springer Nature journal article supplement (doi:10.1186/s12889-022-12704-0), 2022-02-24

**Additional file 1: Sequential explanatory mixed-methods study of Healthy Start vitamin take-up in North West England, 2012**

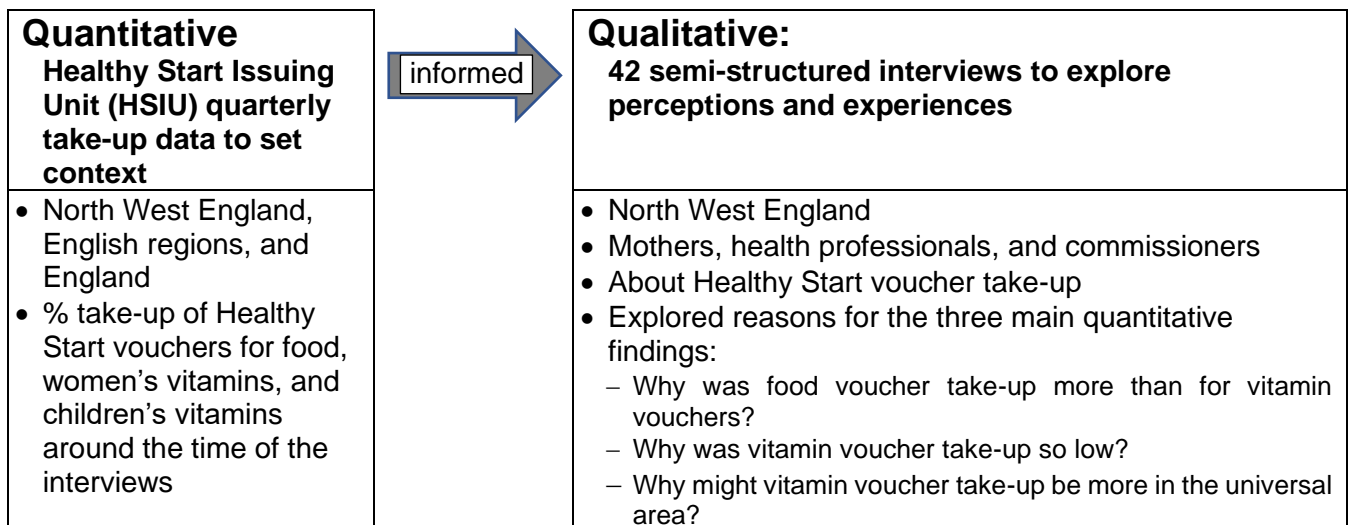

Supplement: MOESM1 [file 20165910]
