# Supplementary material for: An exploration of the statutory Healthy Start vitamin supplementation scheme in North West England
Source: Springer Nature journal article supplement (doi:10.1186/s12889-022-12704-0), 2022-02-24
Supplement: MOESM2 [file 20165910]

## Additional file 2: Healthy Start findings: Quantitative (and Observations): e-Commentary and e-Table

**Expanded commentary (colour-coded to link to data in e-Table below):** Take-up (%) of Healthy Start food, women's vitamin, and children's vitamin vouchers, by English region and North West areas in the lead-up to 2012 interviews of mothers, health professionals, and commissioners about Healthy Start voucher take-up (North West England)

**Take-up of food vouchers exceeded vitamin vouchers considerably** just before this interview-study, in all nine English regions (e-Table below).

Over the first quarters (e-Table below) of 2009/10–2012/13, for example, median voucher take-up was: England=79.7% for food, 2.4% for women's vitamins, 2.0% for children's vitamins; North West=80.9%, 3.2%, 2.1%, respectively.

**While take-up of food vouchers decreased slightly and of women's and children's vitamins increased slightly, vitamin take-up remained very low** just before this interview-study. Overall, between Q1-2009/10 and Q3-2012/13 (just after the interview-phase), food voucher take-up decreased from (e-Table below for initial percentages):

79.7% to 77.2% in England

80.9% to 79.3% in North West

whereas women's and children's vitamin take-up increased, respectively, from:

0.3% to 6.6% in England

0.2% to 4.3% in North West

0.7% to 3.3% in England

0.5% to 2.5% in North West

**Take-up of food and vitamin vouchers appeared higher in the universal versus the targeted areas of the North West**, being significantly higher in the two universal areas combined than in the targeted areas combined, e.g. in Q1-2010/11:

Food: 83.7% (4,401/5,258) versus 81.6% (69,685/85,404) ( $p<0.0001$ ,  $\chi^2=14.7$ )

Women's vitamins: 11.0% (221/2,008) versus 3.0% (961/31,864) ( $p<0.0001$ ,  $\chi^2=358.1$ )

Children's vitamins: 6.3% (376/5,961) versus 1.8% (1,736/94,563) ( $p<0.0001$ ,  $\chi^2=545.2$ )

**In the two interview-areas:** Universal Area-1 take-up of women's and children's vitamin vouchers exceeded that for targeted Area-2 in Q1-2011/12 and Q1-2012/13, i.e. before and after the interview-period (e-Table below).

**Vitamins in locked cupboards: Observations:** In the targeted area, one centre had no vitamins (awaiting delivery for over two months) and the only centre with a cupboard-opening protocol was the best stocked. In the universal area, both centres had a protocol; one had no children's vitamins. Overall, vitamin supplies were minimal in the other centres.

At the nearest pharmacy to each centre (10-14 minutes' walk), the cheapest children's and women's vitamins were 3-4 times and 17-43 times the daily price of the Healthy Start vitamins, respectively.

**e-Table:** Take-up (%) of Healthy Start food, women's vitamin, and children's vitamin vouchers, by English region and North West areas, on one day in a 4-week cycle each quarter-year (Q): Q1 2009/10–Q1 2010/11 and Q1 2011/12 and Q1 2012/13

| Vouchers for:                                              | Potential no.†<br>to be claimed<br>(2009/10 Q2) | 4-week cycle-no. |       |       |       | Percentage |         |         |
|------------------------------------------------------------|-------------------------------------------------|------------------|-------|-------|-------|------------|---------|---------|
|                                                            |                                                 | 2009/10          |       |       |       | 2010/11    | 2011/12 | 2012/13 |
| F=food<br>W=women's vitamins<br>C=children's vitamin drops |                                                 | Q1-81            | Q2-84 | Q3-86 | Q4-89 | Q1-94      | Q1      | Q1      |
| East Midlands                                              | F 38,508                                        | 79.9             | 80.1  | 80.2  | 80.4  | 80.6       | 80.2    | 72.6    |
|                                                            | W 14,068                                        | 0.4              | 0.3   | 0.7   | 1.6   | 1.5        | 4.5     | 7.3     |
|                                                            | C 52,470                                        | 0.8              | 0.2   | 1.1   | 1.7   | 1.3        | 2.6     | 3.2     |
| East of England                                            | F 39,812                                        | 75.1             | 75.0  | 75.1  | 75.2  | 75.4       | 75.1    | 68.5    |
|                                                            | W 14,604                                        | 0.9              | 0.1   | 1.6   | 3.7   | 2.0        | 2.5     | 9.0     |
|                                                            | C 54,470                                        | 0.9              | <0.1  | 2.0   | 2.0   | 1.6        | 2.1     | 5.1     |
| London                                                     | F 94,266                                        | 80.7             | 80.4  | 80.1  | 80.1  | 79.8       | 78.8    | 65.3    |
|                                                            | W 34,741                                        | 0.2              | <0.1  | 0.3   | 0.4   | 0.8        | 2.0     | 7.5     |
|                                                            | C 129,574                                       | 0.6              | 0.3   | 0.6   | 1.1   | 1.3        | 2.2     | 4.0     |
| North East                                                 | F 29,667                                        | 84.2             | 84.4  | 84.4  | 84.5  | 85.3       | 85.0    | 77.3    |
|                                                            | W 10,851                                        | <0.1             | 0.1   | 0.1   | 0.6   | 0.8        | 1.1     | 2.2     |
|                                                            | C 40,470                                        | 0.1              | 0.2   | 0.2   | 0.7   | 0.7        | 0.6     | 1.3     |
| North West                                                 | F 72,130                                        | 80.9             | 81.0  | 81.0  | 81.1  | 81.7       | 80.9    | 72.5    |
| n=24 areas                                                 | W 26,368                                        | 0.2              | 1.5   |       | 1.9   | 3.5        | 2.8     | 4.5     |
|                                                            | C 98,347                                        | 0.5              | 0.7   | 1.1   | 1.7   | 2.1        | 2.1     | 2.7     |
| Area-1-studied: Universal                                  | F                                               |                  | 82.2  | 81.9  | 82.0  | 81.2       | 80.3    | 75.1    |
|                                                            | W                                               |                  | ---   | 1.1   | 3.4   | 6.9        | 8.7     | 15.5    |
|                                                            | C                                               |                  | ---   | 1.9   | 5.3   | 6.2        | 10.5    | 6.6     |
| Area-3: Universal                                          | F                                               |                  | 85.1  | 84.8  | 85.3  | 86.5       | 84.4    | 68.5    |
|                                                            | W                                               |                  | 2.9   | 7.5   | 8.9   | 15.4       | 6.6     | 6.6     |
|                                                            | C                                               |                  | 2.8   | 4.5   | 5.4   | 6.4        | 7.3     | 8.5     |
| Area-2-studied: Targeted                                   | F                                               |                  | 83.3  | 83.3  | 82.7  | 83.1       | 82.5    | 78.3    |
|                                                            | W                                               |                  | 5.9   | 2.3   | 4.8   | 14.7       | 7.1     | 3.4     |
|                                                            | C                                               |                  | 1.6   | 1.7   | 3.7   | 8.4        | 4.7     | 1.9     |
| Area-2 & 4→24: Targeted                                    | F                                               |                  | 80.8  | 80.8  | 80.9  | 81.6       |         |         |
|                                                            | W                                               |                  | 1.5   | 1.1   | 1.7   | 3.0        |         |         |
|                                                            | C                                               |                  | 0.6   | 1.0   | 1.5   | 1.8        |         |         |
| South East                                                 | F 53,030                                        | 74.6             | 74.9  | 74.8  | 74.6  | 75.0       | 74.7    | 67.7    |
|                                                            | W 19,421                                        | 0.2              | 0.2   | 0.2   | 0.5   | 1.8        | 2.2     | 5.5     |
|                                                            | C 72,435                                        | 0.3              | 0.2   | 0.4   | 0.8   | 2.2        | 1.3     | 2.9     |
| South West                                                 | F 34,387                                        | 77.8             | 78.0  | 78.1  | 77.8  | 78.2       | 77.5    | 70.6    |
|                                                            | W 12,515                                        | 0.5              | 0.3   | 0.9   | 1.5   | 0.6        | 2.1     | 2.7     |
|                                                            | C 46,676                                        | 0.4              | 0.5   | 1.0   | 1.5   | 0.7        | 0.5     | 1.6     |
| West Midlands                                              | F 62,054                                        | 82.2             | 82.1  | 82.3  | 82.3  | 82.9       | 82.8    | 72.7    |
|                                                            | W 22,628                                        | 0.5              | 1.9   | 1.5   | 2.7   | 4.5        | 4.0     | 13.2    |
|                                                            | C 84,395                                        | 2.0              | 1.1   | 1.9   | 2.1   | 4.1        | 2.8     | 6.2     |
| Yorkshire & the Humber                                     | F 53,121                                        | 81.5             | 81.8  | 81.4  | 81.9  | 82.4       | 82.1    | 72.6    |
|                                                            | W 19,287                                        | 0.1              | 0.1   | 1.0   | 1.6   | 1.1        | 2.8     | 4.2     |
|                                                            | C 71,935                                        | 0.4              | 0.1   | 1.7   | 2.7   | 1.7        | 2.0     | 2.3     |
| England (total)††                                          | F 476,975                                       | 79.7             | 79.8  | 79.7  | 79.7  | 80.1       | 79.6    | 70.4    |
|                                                            | W 174,482                                       | 0.3              | 0.6   | 0.9   | 1.6   | 2.0        | 2.7     | 6.6     |
|                                                            | C 650,772                                       | 0.7              | 0.4   | 1.1   | 1.6   | 1.9        | 2.0     | 3.5     |

At that time, earliest voucher take-up data made available from HSIU were Q1–2009/10 (April 2009). Data received changed over time: Q1–2009/10 to Q2–2010/11: numbers and %; Q3–10/11 to Q3–12/13: % only. Several data-columns are suppressed above to de-clutter presentation.

--- denotes: Local administrative area submitted no vitamin claim for reimbursement ■ denotes: Raw data from HSIU were unavailable for calculation

† Weekly food voucher(s) for: pregnant women=1; 1–4-year-olds=1; infants=2 8-weekly vitamin voucher for: women's bottle; children's bottle

†† England total is not the exact sum of the regions due to rounding.

Department of Health HSIU (Healthy Start Issuing Unit) database
